# Supplementary material
Source: Elsevier journal article supplement (http://publikationen.ub.uni-frankfurt.de/files/76487/mmc1.pdf)
Supplement: mmc1 [file mmc1.pdf]

# Supplementary Information

## Bioinformatic analysis

|          |                                                               |     |
|----------|---------------------------------------------------------------|-----|
| alr2269N | TEPRVLVSEVLVRFQSQQLTPELETQVYNVIRTPGRTTTRSQLQEDINAIFGTGFFSNV   | 60  |
| 2QDZ     | -----                                                         | 0   |
| ptToc75  | -----                                                         | 0   |
| alr2269N | QASPEDTPLGVRVSVFIVQPNPVLSKVEIQANPGTNVPSVLP---QATADEIFRAQYGKIL | 117 |
| 2QDZ     | -----                                                         | 0   |
| ptToc75  | -----NMPIQRVVVPNST--VLPN---EVI-QLAANRAG-VVGHPL                | 34  |
| alr2269N | NLRDLQEGIKELTKRYQDQGYVLANVVGAPQVSENGVVTLQVAEGVVENISVRFRNKEGQ  | 177 |
| 2QDZ     | -----                                                         | 0   |
| ptToc75  | QSTSIQSFAKSLKEWYIRKGYILHSVTGATLQSETGTAITIVQEPAVSKDPVGITFCKEM  | 94  |
| alr2269N | DVNEQQQPIRGRTQDYIITREVELKPGQVFNNT-V-QKDLQRVFGTGLFE-D-V-NVSL   | 232 |
| 2QDZ     | -----                                                         | 0   |
| ptToc75  | VVDTFVPTAGHTRPNRIASALGLSPGNPFQ---W-DGIRWQQIASSGIFAQ-V-LRATP   | 148 |
| alr2269N | DPGTDPTKVVVVNVVERS-----                                       | 251 |
| 2QDZ     | -----QLLPGARDLNRIDDRQRKEQLQAAAAAAAAATSGHTVTVHAVD              | 41  |
| ptToc75  | QP-MQDGTVQLHILATEA-----                                       | 165 |
| alr2269N | -----                                                         | 251 |
| 2QDZ     | LDFGVEGRFLFDPAPLVQDYLNRPDNEQLFLLVKALSAAALYDRGYATSIVTFVPPGVVDG | 101 |
| ptToc75  | -----                                                         | 165 |
| alr2269N | -----                                                         | 251 |
| 2QDZ     | VLKLVVEWGRIKGLWIDGKPLEGTRDRMMVFSAMPGWQDKVLNVFDIDQAIYNINNGGKT  | 161 |
| ptToc75  | -----                                                         | 165 |
| alr2269N | -----                                                         | 251 |
| 2QDZ     | GNITIVPADEYGYSLDLQLQRRALPRVSLGMDNSGPGTPENG---RYKYNASVTANDL    | 217 |
| ptToc75  | -----PTRHLEYGLGKS-----LYTGSWEGELDFEHINL                       | 194 |
| alr2269N | -----                                                         | 251 |
| 2QDZ     | LGLNDTLGLYIGNRY--RDAGHD-AERNYDLMYSVPL--GR--TRLDLQTGYSTYRNL    | 270 |
| ptToc75  | LGGGESLGLSVRRG--TK-----DAEPSIRLSFTDSKFG--LGGGYDLEVFSDFIGDQP   | 244 |
| alr2269N | -----                                                         | 251 |
| 2QDZ     | KTRYGQ-----YQSAGNSRSFGLKATRLLYRDRSQFSVYGGKLRQNKNYLAGTRLD      | 323 |
| ptToc75  | EEMQEGELPPDYDHSILDRKGATVRLRNPICSRIVRNSVASGSLERTATKTGLH---ET   | 301 |
| alr2269N | -----                                                         | 251 |
| 2QDZ     | VSSKHYSDVTVGMQYSTQRGANAYFGDLSFTRGVGV-----GNVSRFN              | 366 |
| ptToc75  | IGSTTLAVGPFVKRLPYDARS-SIDAKCSLGRFLFAASSTTEEANALLPPLKLPYTSAT   | 360 |
| alr2269N | -----                                                         | 251 |
| 2QDZ     | GSLAWTRYMALA--GQPIQWASQLGFQYSRQQ-----LLNSYQITAGAAAAAGAAAA     | 418 |
| ptToc75  | ATTRQIFPLLASFGPGGRPLILALKHSI---TTATPNLPRHEAKAQGIAHNIRGSSING   | 416 |
| alr2269N | -----                                                         | 251 |
| 2QDZ     | AASGDSGVYLSNLTVPVQFSLGKQASVAPFVGADV GALKSNHPDARTIRMAGLAAGVR   | 478 |
| ptToc75  | RVA--SALTGTTELRVPIDIPVVQIRQDTNVVFFGDWLF AAKDS-QSSFRRKSCVGVGVR | 473 |
| alr2269N | -----                                                         | 251 |
| 2QDZ     | FDLPYARMSFTYSK-----PVGAQPGGAPRAPVWLYINAGLSF                   | 516 |
| ptToc75  | KSVQGIPLKYDLCYSSDDGK-----FQSAFGLGADDFD                        | 506 |

### Supplemental Figure 1. Structural analysis of ptOmp85

Multiple alignment of the N-terminal part of alr2269, the crystal structure of FhaC (PDB:2QDZ) and Toc75 from *Phaeodactylum tricorutum* constructed with MAFFT v6.624b (38), manually adjusted and fed to Modeller v8.2 for constructing the homology model.







|                  |       | 1220    | 1230     | 1240      | 1250    | 1260   | 1270   | 1280    | 1290  | 1300  | 1310   |          |           |         |         |         |       |       |        |       |     |      |      |   |     |
|------------------|-------|---------|----------|-----------|---------|--------|--------|---------|-------|-------|--------|----------|-----------|---------|---------|---------|-------|-------|--------|-------|-----|------|------|---|-----|
| Nmen/1-797       | ----- | -----   | -----    | -----     | -----   | -----  | -----  | -----   | ----- | ----- | -----  |          |           |         |         |         |       |       |        |       |     |      |      |   |     |
| Ecol/1-810       | ----- | -----   | -----    | -----     | -----   | -----  | -----  | -----   | ----- | ----- | -----  |          |           |         |         |         |       |       |        |       |     |      |      |   |     |
| Clar/1-738       | ----- | -----   | -----    | -----     | -----   | -----  | -----  | -----   | ----- | ----- | -----  |          |           |         |         |         |       |       |        |       |     |      |      |   |     |
| Ddes/1-893       | ----- | -----   | -----    | -----     | -----   | -----  | -----  | -----   | ----- | ----- | -----  |          |           |         |         |         |       |       |        |       |     |      |      |   |     |
| Rrub/1-778       | ----- | -----   | -----    | -----     | -----   | -----  | -----  | -----   | ----- | ----- | -----  |          |           |         |         |         |       |       |        |       |     |      |      |   |     |
| Cpha/1-821       | ----- | -----   | -----    | -----     | -----   | -----  | -----  | -----   | ----- | ----- | -----  |          |           |         |         |         |       |       |        |       |     |      |      |   |     |
| Tthe/1-822       | ----- | -----   | -----    | -----     | -----   | -----  | -----  | -----   | ----- | ----- | -----  |          |           |         |         |         |       |       |        |       |     |      |      |   |     |
| Fnuc/1-678       | ----- | -----   | -----    | -----     | -----   | -----  | -----  | -----   | ----- | ----- | -----  |          |           |         |         |         |       |       |        |       |     |      |      |   |     |
| Ana1/1-833       | ----- | -----   | -----    | -----     | -----   | -----  | -----  | -----   | ----- | ----- | -----  |          |           |         |         |         |       |       |        |       |     |      |      |   |     |
| AthaV/1-732      | ----- | -----   | -----    | -----     | -----   | -----  | -----  | -----   | ----- | ----- | -----  |          |           |         |         |         |       |       |        |       |     |      |      |   |     |
| AthaIII/1-818    | ----- | -----   | -----    | -----     | -----   | -----  | -----  | -----   | ----- | ----- | -----  |          |           |         |         |         |       |       |        |       |     |      |      |   |     |
| AthaM/1-524      | ----- | -----   | -----    | -----     | -----   | -----  | -----  | -----   | ----- | ----- | -----  |          |           |         |         |         |       |       |        |       |     |      |      |   |     |
| Xlae/1-468       | ----- | -----   | -----    | -----     | -----   | -----  | -----  | -----   | ----- | ----- | -----  |          |           |         |         |         |       |       |        |       |     |      |      |   |     |
| Ptri/1-690       | ----- | -----   | -----    | -----     | -----   | -----  | -----  | -----   | ----- | ----- | -----  |          |           |         |         |         |       |       |        |       |     |      |      |   |     |
| Cmer/1-840       | ----- | -----   | -----    | -----     | -----   | -----  | -----  | -----   | ----- | ----- | -----  |          |           |         |         |         |       |       |        |       |     |      |      |   |     |
| Cmer_Sam50/1-541 | ----- | -----   | -----    | -----     | -----   | -----  | -----  | -----   | ----- | ----- | -----  |          |           |         |         |         |       |       |        |       |     |      |      |   |     |
| Tpse/1-804       | ----- | -----   | -----    | -----     | -----   | -----  | -----  | -----   | ----- | ----- | -----  |          |           |         |         |         |       |       |        |       |     |      |      |   |     |
| Ehux/1-636       | ----- | -----   | -----    | -----     | -----   | -----  | -----  | -----   | ----- | ----- | -----  |          |           |         |         |         |       |       |        |       |     |      |      |   |     |
| Tgon/1-1425      | 592   | VSGVSA  | LPATPP   | POTPARLLV | PAGHFRV | GFAAS  | GERRL  | GAGTM   | GEATI | ERRK  | GLYVNL | GLAGSASR | GSDSSRL   | PSSLA   | EASDT   | SHV     | SEKRN | EDAP  | PHRK   | 692   |     |      |      |   |     |
|                  |       | 1320    | 1330     | 1340      | 1350    | 1360   | 1370   | 1380    | 1390  | 1400  | 1410   |          |           |         |         |         |       |       |        |       |     |      |      |   |     |
| Nmen/1-797       | 464   | -----   | -----    | -----     | -----   | -----  | -----  | -----   | ----- | ----- | -----  | -----    | -----     | -----   | -----   | -----   | ----- | ----- | -----  | ----- | 484 |      |      |   |     |
| Ecol/1-810       | 464   | -----   | -----    | -----     | -----   | -----  | -----  | -----   | ----- | ----- | -----  | -----    | -----     | -----   | -----   | -----   | ----- | ----- | -----  | ----- | 484 |      |      |   |     |
| Clar/1-738       | 457   | -----   | -----    | -----     | -----   | -----  | -----  | -----   | ----- | ----- | -----  | -----    | -----     | -----   | -----   | -----   | ----- | ----- | -----  | ----- | 477 |      |      |   |     |
| Ddes/1-893       | 604   | -----   | -----    | -----     | -----   | -----  | -----  | -----   | ----- | ----- | -----  | -----    | -----     | -----   | -----   | -----   | ----- | ----- | -----  | ----- | 624 |      |      |   |     |
| Rrub/1-778       | 480   | -----   | -----    | -----     | -----   | -----  | -----  | -----   | ----- | ----- | -----  | -----    | -----     | -----   | -----   | -----   | ----- | ----- | -----  | ----- | 500 |      |      |   |     |
| Cpha/1-821       | 513   | -----   | -----    | -----     | -----   | -----  | -----  | -----   | ----- | ----- | -----  | -----    | -----     | -----   | -----   | -----   | ----- | ----- | -----  | ----- | 534 |      |      |   |     |
| Tthe/1-822       | 493   | -----   | -----    | -----     | -----   | -----  | -----  | -----   | ----- | ----- | -----  | -----    | -----     | -----   | -----   | -----   | ----- | ----- | -----  | ----- | 517 |      |      |   |     |
| Fnuc/1-678       | 378   | -----   | -----    | -----     | -----   | -----  | -----  | -----   | ----- | ----- | -----  | -----    | -----     | -----   | -----   | -----   | ----- | ----- | -----  | ----- | 399 |      |      |   |     |
| Ana1/1-833       | 509   | -----   | -----    | -----     | -----   | -----  | -----  | -----   | ----- | ----- | -----  | -----    | -----     | -----   | -----   | -----   | ----- | ----- | -----  | ----- | 529 |      |      |   |     |
| AthaV/1-732      | 445   | -----   | -----    | -----     | -----   | -----  | -----  | -----   | ----- | ----- | -----  | -----    | -----     | -----   | -----   | -----   | ----- | ----- | -----  | ----- | 465 |      |      |   |     |
| AthaIII/1-818    | 502   | -----   | -----    | -----     | -----   | -----  | -----  | -----   | ----- | ----- | -----  | -----    | -----     | -----   | -----   | -----   | ----- | ----- | -----  | ----- | 523 |      |      |   |     |
| AthaM/1-524      | 197   | -----   | -----    | -----     | -----   | -----  | -----  | -----   | ----- | ----- | -----  | -----    | -----     | -----   | -----   | -----   | ----- | ----- | -----  | ----- | 218 |      |      |   |     |
| Xlae/1-468       | 166   | -----   | -----    | -----     | -----   | -----  | -----  | -----   | ----- | ----- | -----  | -----    | -----     | -----   | -----   | -----   | ----- | ----- | -----  | ----- | 186 |      |      |   |     |
| Ptri/1-690       | 393   | -----   | -----    | -----     | -----   | -----  | -----  | -----   | ----- | ----- | -----  | -----    | -----     | -----   | -----   | -----   | ----- | ----- | -----  | ----- | 410 |      |      |   |     |
| Cmer/1-840       | 433   | -----   | -----    | -----     | -----   | -----  | -----  | -----   | ----- | ----- | -----  | -----    | -----     | -----   | -----   | -----   | ----- | ----- | -----  | ----- | 455 |      |      |   |     |
| Cmer_Sam50/1-541 | 171   | -----   | -----    | -----     | -----   | -----  | -----  | -----   | ----- | ----- | -----  | -----    | -----     | -----   | -----   | -----   | ----- | ----- | -----  | ----- | 200 |      |      |   |     |
| Tpse/1-804       | 451   | -----   | -----    | -----     | -----   | -----  | -----  | -----   | ----- | ----- | -----  | -----    | -----     | -----   | -----   | -----   | ----- | ----- | -----  | ----- | 469 |      |      |   |     |
| Ehux/1-636       | 349   | -----   | -----    | -----     | -----   | -----  | -----  | -----   | ----- | ----- | -----  | -----    | -----     | -----   | -----   | -----   | ----- | ----- | -----  | ----- | 412 |      |      |   |     |
| Tgon/1-1425      | 693   | ESQSW   | GDKVRNAL | GMLOPP    | RFA     | PTTTT  | TSVAMV | SADDVA  | LL    | PSRER | GSVL   | TDP      | SAHDVAKVA | GGVRFQF | SESSRQF | GFLP    | PTRLA | PTW   | GFEASS | FA    | GV  | 791  |      |   |     |
|                  |       | 1420    | 1430     | 1440      | 1450    | 1460   | 1470   | 1480    | 1490  | 1500  | 1510   |          |           |         |         |         |       |       |        |       |     |      |      |   |     |
| Nmen/1-797       | 485   | -----   | -----    | -----     | -----   | -----  | -----  | -----   | ----- | ----- | -----  | -----    | -----     | -----   | -----   | -----   | ----- | ----- | -----  | ----- | 509 |      |      |   |     |
| Ecol/1-810       | 485   | -----   | -----    | -----     | -----   | -----  | -----  | -----   | ----- | ----- | -----  | -----    | -----     | -----   | -----   | -----   | ----- | ----- | -----  | ----- | 507 |      |      |   |     |
| Clar/1-738       | 478   | -----   | -----    | -----     | -----   | -----  | -----  | -----   | ----- | ----- | -----  | -----    | -----     | -----   | -----   | -----   | ----- | ----- | -----  | ----- | 495 |      |      |   |     |
| Ddes/1-893       | 625   | -----   | -----    | -----     | -----   | -----  | -----  | -----   | ----- | ----- | -----  | -----    | -----     | -----   | -----   | -----   | ----- | ----- | -----  | ----- | 642 |      |      |   |     |
| Rrub/1-778       | 501   | -----   | -----    | -----     | -----   | -----  | -----  | -----   | ----- | ----- | -----  | -----    | -----     | -----   | -----   | -----   | ----- | ----- | -----  | ----- | 521 |      |      |   |     |
| Cpha/1-821       | 535   | -----   | -----    | -----     | -----   | -----  | -----  | -----   | ----- | ----- | -----  | -----    | -----     | -----   | -----   | -----   | ----- | ----- | -----  | ----- | 559 |      |      |   |     |
| Tthe/1-822       | 518   | -----   | -----    | -----     | -----   | -----  | -----  | -----   | ----- | ----- | -----  | -----    | -----     | -----   | -----   | -----   | ----- | ----- | -----  | ----- | 553 |      |      |   |     |
| Fnuc/1-678       | 400   | -----   | -----    | -----     | -----   | -----  | -----  | -----   | ----- | ----- | -----  | -----    | -----     | -----   | -----   | -----   | ----- | ----- | -----  | ----- | 413 |      |      |   |     |
| Ana1/1-833       | 530   | -----   | -----    | -----     | -----   | -----  | -----  | -----   | ----- | ----- | -----  | -----    | -----     | -----   | -----   | -----   | ----- | ----- | -----  | ----- | 563 |      |      |   |     |
| AthaV/1-732      | 466   | -----   | -----    | -----     | -----   | -----  | -----  | -----   | ----- | ----- | -----  | -----    | -----     | -----   | -----   | -----   | ----- | ----- | -----  | ----- | 483 |      |      |   |     |
| AthaIII/1-818    | 524   | -----   | -----    | -----     | -----   | -----  | -----  | -----   | ----- | ----- | -----  | -----    | -----     | -----   | -----   | -----   | ----- | ----- | -----  | ----- | 549 |      |      |   |     |
| AthaM/1-524      | 219   | -----   | -----    | -----     | -----   | -----  | -----  | -----   | ----- | ----- | -----  | -----    | -----     | -----   | -----   | -----   | ----- | ----- | -----  | ----- | 239 |      |      |   |     |
| Xlae/1-468       | 187   | -----   | -----    | -----     | -----   | -----  | -----  | -----   | ----- | ----- | -----  | -----    | -----     | -----   | -----   | -----   | ----- | ----- | -----  | ----- | 206 |      |      |   |     |
| Ptri/1-690       | 411   | -----   | -----    | -----     | -----   | -----  | -----  | -----   | ----- | ----- | -----  | -----    | -----     | -----   | -----   | -----   | ----- | ----- | -----  | ----- | 439 |      |      |   |     |
| Cmer/1-840       | 456   | -----   | -----    | -----     | -----   | -----  | -----  | -----   | ----- | ----- | -----  | -----    | -----     | -----   | -----   | -----   | ----- | ----- | -----  | ----- | 468 |      |      |   |     |
| Cmer_Sam50/1-541 | 201   | -----   | -----    | -----     | -----   | -----  | -----  | -----   | ----- | ----- | -----  | -----    | -----     | -----   | -----   | -----   | ----- | ----- | -----  | ----- | 241 |      |      |   |     |
| Tpse/1-804       | 470   | -----   | -----    | -----     | -----   | -----  | -----  | -----   | ----- | ----- | -----  | -----    | -----     | -----   | -----   | -----   | ----- | ----- | -----  | ----- | 502 |      |      |   |     |
| Ehux/1-636       | 413   | LLSAVA  | PRAAG    | LLVGG     | QLS     | -----  | -----  | -----   | ----- | ----- | -----  | -----    | -----     | -----   | -----   | -----   | ----- | ----- | -----  | ----- | 488 |      |      |   |     |
| Tgon/1-1425      | 792   | YTPYA   | AADAAA   | AFA       | PLTSS   | GSASTR | PGSRP  | SRVSRDR | PLPL  | PGLAG | FSPR   | PHV      | TARSL     | SLS     | SLV     | SRVSAFA | AKLV  | PRPL  | LRDES  | SRE   | SQR | CREV | KETV | S | 892 |
|                  |       | 1520    | 1530     | 1540      | 1550    | 1560   | 1570   | 1580    | 1590  | 1600  | 1610   |          |           |         |         |         |       |       |        |       |     |      |      |   |     |
| Nmen/1-797       | 510   | -----   | -----    | -----     | -----   | -----  | -----  | -----   | ----- | ----- | -----  | -----    | -----     | -----   | -----   | -----   | ----- | ----- | -----  | ----- | 528 |      |      |   |     |
| Ecol/1-810       | 508   | -----   | -----    | -----     | -----   | -----  | -----  | -----   | ----- | ----- | -----  | -----    | -----     | -----   | -----   | -----   | ----- | ----- | -----  | ----- | 526 |      |      |   |     |
| Clar/1-738       | 496   | -----   | -----    | -----     | -----   | -----  | -----  | -----   | ----- | ----- | -----  | -----    | -----     | -----   | -----   | -----   | ----- | ----- | -----  | ----- | 510 |      |      |   |     |
| Ddes/1-893       | 643   | -----   | -----    | -----     | -----   | -----  | -----  | -----   | ----- | ----- | -----  | -----    | -----     | -----   | -----   | -----   | ----- | ----- | -----  | ----- | 657 |      |      |   |     |
| Rrub/1-778       | 522   | -----   | -----    | -----     | -----   | -----  | -----  | -----   | ----- | ----- | -----  | -----    | -----     | -----   | -----   | -----   | ----- | ----- | -----  | ----- | 536 |      |      |   |     |
| Cpha/1-821       | 560   | -----   | -----    | -----     | -----   | -----  | -----  | -----   | ----- | ----- | -----  | -----    | -----     | -----   | -----   | -----   | ----- | ----- | -----  | ----- | 577 |      |      |   |     |
| Tthe/1-822       | 554   | -----   | -----    | -----     | -----   | -----  | -----  | -----   | ----- | ----- | -----  | -----    | -----     | -----   | -----   | -----   | ----- | ----- | -----  | ----- | 568 |      |      |   |     |
| Fnuc/1-678       | 414   | -----   | -----    | -----     | -----   | -----  | -----  | -----   | ----- | ----- | -----  | -----    | -----     | -----   | -----   | -----   | ----- | ----- | -----  | ----- | 441 |      |      |   |     |
| Ana1/1-833       | 564   | TNGQDR  | PRVT     | -----     | -----   | -----  | -----  | -----   | ----- | ----- | -----  | -----    | -----     | -----   | -----   | -----   | ----- | ----- | -----  | ----- | 588 |      |      |   |     |
| AthaV/1-732      | 484   | GNQPD   | NSSLTI   | GRV       | -----   | -----  | -----  | -----   | ----- | ----- | -----  | -----    | -----     | -----   | -----   | -----   | ----- | ----- | -----  | ----- | 507 |      |      |   |     |
| AthaIII/1-818    | 550   | PGVEEV  | PP       | IWDRA     | -----   | -----  | -----  | -----   | ----- | ----- | -----  | -----    | -----     | -----   | -----   | -----   | ----- | ----- | -----  | ----- | 580 |      |      |   |     |
| AthaM/1-524      | 240   | -----   | -----    | -----     | -----   | -----  | -----  | -----   | ----- | ----- | -----  | -----    | -----     | -----   | -----   | -----   | ----- | ----- | -----  | ----- | 250 |      |      |   |     |
| Xlae/1-468       | 207   | -----   | -----    | -----     | -----   | -----  | -----  | -----   | ----- | ----- | -----  | -----    | -----     | -----   | -----   | -----   | ----- | ----- | -----  | ----- | 220 |      |      |   |     |
| Ptri/1-690       | 440   | -----   | -----    | -----     | -----   | -----  | -----  | -----   | ----- | ----- | -----  | -----    | -----     | -----   | -----   | -----   | ----- | ----- | -----  | ----- | 461 |      |      |   |     |
| Cmer/1-840       | 469   | -----   | -----    | -----     | -----   | -----  | -----  | -----   | ----- | ----- | -----  | -----    | -----     | -----   | -----   | -----   | ----- | ----- | -----  | ----- | 481 |      |      |   |     |
| Cmer_Sam50/1-541 | 242   | -----   | -----    | -----     | -----   | -----  | -----  | -----   | ----- | ----- | -----  | -----    | -----     | -----   | -----   | -----   | ----- | ----- | -----  | ----- | 255 |      |      |   |     |
| Tpse/1-804       | 503   | -----   | -----    | -----     | -----   | -----  | -----  | -----   | ----- | ----- | -----  | -----    | -----     | -----   | -----   | -----   | ----- | ----- | -----  | ----- | 511 |      |      |   |     |
| Ehux/1-636       | 489   | -----   | -----    | -----     | -----   | -----  | -----  | -----   | ----- | ----- | -----  | -----    | -----     | -----   | -----   | -----   | ----- | ----- | -----  | ----- | 496 |      |      |   |     |
| Tgon/1-1425      | 893   | AALASVS |          |           |         |        |        |         |       |       |        |          |           |         |         |         |       |       |        |       |     |      |      |   |     |





**Supplemental Figure 2. Alignment of Omp85 sequences for the calculation of the phylogenetic tree presented in Figure 1B**

Representation of the alignment of all Omp85 sequences used in the phylogenetic analysis (Fig. 1B) created with JalView (Waterhouse, A.M., Procter, J.B., Martin, D.M.A, Clamp, M. and Barton, G. J. (2009) *Bioinformatics* 25, 1189-1191) and colored with the "Clustal-X" color scheme.



## A

>gi|30687572|ref|NP\_189102.2| PL-SP1 [Arabidopsis thaliana]  
MMVMISLHFSTPPLAFLKSDSNRFLKPNPNFNIQFTPKSQLLFPQRLNFNTGTNLNRRRLSCYGIKDSSETTKS  
APSLDSGDGGGGDGGDDDKGEVEEKNRFLPEWLDFTSDDAQTVFVAIAVSLAFRYFIAEPRYIPSLSMYPTFDVG  
DRLVAEKVSYYFRKPCANDIVIFKSPVVLQEVGYTDADVFIKRIVAKEGDLVEVHNGKLMVNGVARNEKFILEPP  
GYEMTPIRVPENSVFVMGDNRNNSYDSHVWGPLPLKNIIGRSVFRYWPPNRVSGTVLEGGCAVDKQ

>estExt\_gwp\_gw1.C\_chr\_10974| Phatr2:17972 [Phaeodactylum tricornutum]  
MPTISDHTHACRAANLASSPQRRMVLALLALCLSLVAPSVTAERPSTPPAVRSSVFVSSRRTKISWADASSRRKQI  
LGMSDNKNDSPVDRKPASEPGLKASLRNKWEDETPASEPDAGFLEGIKRWFNSDEGREVDKTYFISLFLALLLR  
TIIIEPRFIPSLSMYPTFEVGDQLAVEKVTKRIKPFYRTEVVVFQPPQAFRDIVENQYGDKSKGKEALIKRIVAVE  
GDKVEIKNGKLLINDIEQEEAYTAEDAQYAFGPVRVPPENVLVLGDNRNHSLDGHIWGFLEPTKNVIGRAVAVYVW  
PWRVGNNGMF

## B

```

      *           20           *           40           *
A.thaliana : MMVMISLHFE STPPLAFLKSDSN-----SRFLKPNPNFNIQFTP----- : 38
P.tricornu : -MPTISDHTHACRAANLASSPQRRMVLALLALCLSLVAPSVTAERPSTPPA : 49

      60           *           80           *           100
A.thaliana : -KSQLLFPQRLNFNTGTNLNRRRLSCYGIKDSSE--TTKSAPSLDSGDGG : 85
P.tricornu : VRSSVFVSSRRTKISWADASSRRKQILGMSDNKNDSPVDRKPASEEGLKA : 99

      *           120           *           140           *
A.thaliana : GGDGGDDDKGEVEEKNRFLPEWLD--FTSD----DAQTVFVAIAVSLAFR : 129
P.tricornu : SLRNKWEDETPASEPDAGFLEGIKRWFNSDEGREVDKTYFISLFLALLLR : 149

      160           *           180           *           200
A.thaliana : YETIAEPRYIPSLSMYPTFDVGDRLVAEKVSYYFRKPCANDIVIFKSPVVL : 179
P.tricornu : ETIIIEPRFIPSLSMYPTFEVGDQLAVEKVTKRIKPFYRTEVVVFQPPQAF : 199

      *           220           *           240           *
A.thaliana : QEVGY-----TDADVFIKRIVAKEGDLVEVHNGKLMVNGVARNEKFIL : 222
P.tricornu : RDIVENQYGDKSKGKEALIKRIVAVEGDKVEIKNGKLLINDIEQEEAYTA : 249

      260           *           280           *           300
A.thaliana : EPPGYEMTPIRVPENSVFVMGDNRNNSYDSHVWGPLPLKNIIGRSVFRYW : 272
P.tricornu : EDAQYAFGPVRVPPENVLVLGDNRNHSLDGHIWGFLEPTKNVIGRAVAVYVW : 299

      *
A.thaliana : PPNRVSGTVLEGGCAVDKQ : 291
P.tricornu : PEWRVG----NGGMF---- : 310
```

### Supplemental Figure 3. Identification of the putative PL-SP1 homologue in *P. tricornutum*

*A.* The two sequences which were compared are shown. The predicted signal peptide is shown in blue and the predicted transit peptide in red. *B.* The alignment of *A. thaliana* plastidic type I signal peptidase 1 and the respective homologue from *P. tricornutum* is shown. Note that the conserved functional domain starts at ~aa120.
